# Supplementary material
Source: PubMed Central journal article supplement (PMC6980739)
Supplement: NIHMS1544362-supplement-1.pdf [file NIHMS1544362-supplement-1.pdf]

## Supplementary Information

**Supplementary Table 1. NDA Data Release 2.0/2.0.1 Variables**

| Data Tables and Variables (NDA Release 2.0/2.0.1)                      | Variable Labels in Current Report       |
|------------------------------------------------------------------------|-----------------------------------------|
| <b>Demographics (pdem02)</b>                                           |                                         |
| demo_comb_income_v2b                                                   | Family Income                           |
| demo_prnt_ed_v2b                                                       | Caregiver (Parent) 1 Education Level    |
| demo_prnt_ed_v2b                                                       | Caregiver (Parent) 2 Education Level    |
| <b>NIH Toolbox (abcd_tbss01)</b>                                       |                                         |
| nihbx_totalcomp_uncorrected                                            | Cognitive Test Score                    |
| <b>Structural MRI (abcd_smrip101)</b>                                  |                                         |
| smri_thick_cdk_mean                                                    | Whole-Brain Mean Cortical Thickness     |
| smri_area_cdk_total                                                    | Whole-Brain Total Cortical Surface Area |
| smri_vol_cdk_total                                                     | Whole-Brain Total Cortical Volume       |
| <b>Residential History (abcd_rhds01)</b>                               |                                         |
| reshist_addr1_valid                                                    | Validity of Primary Residential Address |
| reshist_addr1_leadrisk                                                 | Lead Risk                               |
| reshist_addr1_adi_perc                                                 | Area Deprivation Index (ADI)            |
| <b>Longitudinal Tracking (abcd_lt01)</b>                               |                                         |
| site_id_1                                                              | Site ID Number                          |
| <b>American Community Survey Post Stratification Weights (acpsw03)</b> |                                         |
| interview_age                                                          | Age                                     |
| gender                                                                 | Sex                                     |
| race_ethnicity                                                         | Race/Ethnicity                          |
| rel_family_id                                                          | Family ID Number                        |

**Note:** The non-imaging data from the current manuscript came from Public Data Release 2.0. The imaging (structural MRI) data came from the ABCD Fix Release 2.0.1.

**Supplementary Table 2. Source and details of the elevated blood lead level (EBLL) data and number of data points included and census tracts represented in the analysis.**

| Region                      | Year(s) Included | Criterion (µg/dL) | Age Range   | Suppression Rule        | Census Tracts (Data Points)  |
|-----------------------------|------------------|-------------------|-------------|-------------------------|------------------------------|
| Chicago <sup>67</sup>       | 2009-13          | 6                 | 0-5 yr      | N/A                     | 796 (547,829)                |
| Colorado <sup>68</sup>      | 2010-14          | 5                 | 0-6 yr      | EBLL: <3                | 321 (65,181)                 |
| Indiana <sup>68</sup>       | 2011-15          | 5                 | 0-7 yr      | N/A                     | 1,503 (203,828)              |
| Maryland <sup>69</sup>      | 2010-14          | 5                 | 0-6 yr      | EBLL: <11               | 992 (377,336)                |
| Massachusetts <sup>70</sup> | 2012-16          | 5                 | 9 mo – 4 yr | EBLL: 1-5; Total: <1200 | 1,200 (323,826) <sup>a</sup> |
| Michigan <sup>71</sup>      | 2017             | 4.5               | 0-6 yr      | Total: <6               | 2,691 (142,813)              |
| Minnesota <sup>72</sup>     | 2012-16          | 5                 | 0-6 yr      | EBLL: 1-4               | 649 (150,394)                |
| Missouri <sup>68</sup>      | 2010-15          | 5                 | 0-72 mo     | N/A                     | 1,310 (533,005)              |
| New York City <sup>68</sup> | 2010-15          | 5                 | 0-72 mo     | 5 U.S. Code §552 (b)(6) | 1,711 (726,519)              |
| Ohio <sup>68</sup>          | 2010-15          | 5                 | 0-72 mo     | 5 U.S. Code §552 (b)(6) | 2,792 (378,873)              |
| Oregon*                     | 2013-16          | 5                 | 0-6 yr      | N/A                     | 393 (35,334)                 |
| Pennsylvania <sup>68</sup>  | 2010-15          | 5                 | 0-72 mo     | 5 U.S. Code §552 (b)(6) | 1,336 (62,145)               |
| Rhode Island <sup>†</sup>   | 2012-16          | 5                 | 0-6 yr      | N/A                     | 240 (128,623)                |
| Washington <sup>§</sup>     | 2012-16          | 5                 | 0-72 mo     | N/A                     | 1,408 (33,482)               |
| Wisconsin <sup>73</sup>     | 2013-16          | 5                 | 0-6 yr      | Total: <5               | 1,384 (177,749)              |

**Note:** The data provided for this analysis were initially formatted in terms of the number of tests and the number of positive tests (i.e., an EBLL). These data were re-coded, as described in the main text. While some of these data may reflect multiple tests per child, depending on the state or city, some of these data may reflect the highest test result. Thus, we generally referred to the number of data points as the number of reported tests. “Region” and “Year(s) Included” refer to the state or city for which data were retrieved and the testing year(s) of those data. “Criterion (µg/dL)” refers to the BLL signifying EBLLs vs. non-EBLLs. “Age Range” refers to the age(s) of the children, as specified in the data table or by the person(s) providing the data. “Suppression Rule” refers to the criterion used to dictate the provision of data at the census-tract level. In the “Suppression Rule” column, “N/A” means that a suppression rule was either not used or was not apparent based on inspection of data; “5 U.S. Code §552 (b)(6)” refers to U.S. Code, Section 552, Exemption 6 (<https://www.justice.gov/oip/freedom-information-act-5-usc-552>), which was indicated as “(b)(6)” in the data files used to generate the Reuters report; for the data from Maryland, when the total EBLL value was suppressed, we back-calculated an approximate EBLL count value based on the reported EBLL percentage and the total number screened. In the “Suppression Rule” column, “EBLL” refers to the values of EBLLs that were suppressed, while “Total” refers to the values of total number of tests that were suppressed. The Reuters data were kindly provided by the authors of the corresponding article.<sup>68</sup> \*Oregon’s data were kindly provided on request by Department of Human Services and Oregon Health Authority. †Rhode Island’s data were kindly provided on request by the Rhode Island Department of Health. §Washington’s data were kindly provided on request by the Washington State Department of Health. <sup>a</sup>Massachusetts’ data were explicitly identified as including only confirmed EBLLs.

**Supplementary Table 3. Linear mixed-effects model output for the analysis of lead risk, family income, and cognitive test scores.**

|                                  | <i>t</i> (9699) | <i>p</i> | <i>b</i> | 95% CI         |
|----------------------------------|-----------------|----------|----------|----------------|
| Intercept                        | 295.27          | < .001   | 83.79    | [83.23, 84.34] |
| Sex                              | 4.06            | < .001   | 0.31     | [0.16, 0.46]   |
| Race/Ethnicity (Asian)           | 5.31            | < .001   | 2.43     | [1.53, 3.33]   |
| Race/Ethnicity (Black)           | -17.16          | < .001   | -4.08    | [-4.54, -3.61] |
| Race/Ethnicity (Hispanic)        | -1.37           | .171     | -0.29    | [-0.71, 0.13]  |
| Race/Ethnicity (Other)           | 2.63            | .009     | 0.61     | [0.16, 1.07]   |
| Family Income (High)             | 8.24            | < .001   | 1.16     | [0.89, 1.44]   |
| Family Income (Low)              | -9.62           | < .001   | -1.47    | [-1.77, -1.17] |
| Age                              | 36.82           | < .001   | 0.37     | [0.35, 0.39]   |
| Lead Risk                        | -2.17           | .030     | -0.07    | [-0.13, -0.01] |
| Maximum Parental Education       | 19.32           | < .001   | 1.72     | [1.55, 1.90]   |
| Family Income (High) × Lead Risk | 3.51            | < .001   | 0.13     | [0.06, 0.21]   |
| Family Income (Low) × Lead Risk  | -3.04           | .002     | -0.12    | [-0.20, -0.04] |

**Note:** The linear mixed-effects model incorporates testing the statistical significance of coefficients against a *t*-distribution. Family Income was a categorical, effects-coded factor, in which the level “Mid” served as the reference level. Family Income was operationally defined as the self-reported combined family income and partitioned into three levels: Low Income: ≤ \$50K; Mid Income: \$50K-\$100K; High Income: ≥ \$100K. Sex was also a categorical factor, effect coded with Male/Female as -1/+1. Race/Ethnicity was also a categorical factor, in which “White” served as the reference level. Age, Maximum Parental Education (i.e., highest education level between parents/caregivers), and Lead Risk were centered continuous factors. The random effects structure included a random intercept for study site and family identification number. Random effects were restricted to be uncorrelated. Analysis included 9,712 data points. The model accounted for 64.8% of the variance in the cognitive test score data ( $R^2 = .648$ , adjusted  $R^2 = .647$ ).

**Supplementary Table 4. Linear mixed-effects model output for the analysis of lead risk, family income, and whole-brain mean cortical thickness.**

|                                  | <i>t</i> (9699) | <i>p</i> | <i>b</i> | 95% CI           |
|----------------------------------|-----------------|----------|----------|------------------|
| Intercept                        | 238.02          | < .001   | 2.75     | [2.73, 2.77]     |
| Sex                              | 5.74            | < .001   | 0.01     | [0.004, 0.01]    |
| Race/Ethnicity (Asian)           | -2.72           | .007     | -0.02    | [-0.03, -0.004]  |
| Race/Ethnicity (Black)           | -6.23           | < .001   | -0.02    | [-0.03, -0.01]   |
| Race/Ethnicity (Hispanic)        | 0.21            | .830     | 0.001    | [-0.005, 0.01]   |
| Race/Ethnicity (Other)           | 2.50            | .012     | 0.01     | [0.002, 0.01]    |
| Family Income (High)             | 2.10            | .036     | 0.004    | [0.0003, 0.01]   |
| Family Income (Low)              | -2.37           | .018     | -0.005   | [-0.01, -0.001]  |
| Age                              | -9.86           | < .001   | -0.001   | [-0.002, -0.001] |
| Lead Risk                        | 0.30            | .765     | 0.0001   | [-0.001, 0.001]  |
| Maximum Parental Education       | 2.09            | .037     | 0.002    | [0.0001, 0.005]  |
| Family Income (High) × Lead Risk | 1.55            | .122     | 0.001    | [-0.0002, 0.002] |
| Family Income (Low) × Lead Risk  | -0.12           | .908     | -0.0001  | [-0.001, 0.001]  |

**Note:** The linear mixed-effects model incorporates testing the statistical significance of coefficients against a *t*-distribution. Family Income was a categorical, effects-coded factor, in which the level “Mid” served as the reference level. Family Income was operationally defined as the self-reported combined family income and partitioned into three levels: Low Income: ≤ \$50K; Mid Income: \$50K-\$100K; High Income: ≥ \$100K. Sex was also a categorical factor, effect coded with Male/Female as -1/+1. Race/Ethnicity was also a categorical factor, in which “White” served as the reference level. Age, Maximum Parental Education (i.e., highest education level between parents/caregivers), and Lead Risk were centered continuous factors. The random effects structure included a random intercept for study site and family identification number. Random effects were restricted to be uncorrelated. Analysis included 9,712 data points. The model accounted for 59.5% of the variance in the cortical thickness data ( $R^2 = .595$ , adjusted  $R^2 = .595$ ).

**Supplementary Table 5. Linear mixed-effects model output for the analysis of lead risk, family income, and whole-brain total cortical surface area.**

|                                  | <i>t</i> (9699) | <i>p</i> | <i>b</i>  | 95% CI                 |
|----------------------------------|-----------------|----------|-----------|------------------------|
| Intercept                        | 157.08          | < .001   | 181957.08 | [179686.45, 184227.72] |
| Sex                              | -55.75          | < .001   | -8267.19  | [-8557.89, -7976.50]   |
| Race/Ethnicity (Asian)           | 0.04            | .966     | 38.90     | [-1752.55, 1830.34]    |
| Race/Ethnicity (Black)           | -13.21          | < .001   | -6307.13  | [-7243.24, -5371.02]   |
| Race/Ethnicity (Hispanic)        | 0.93            | .354     | 397.49    | [-443.03, 1238.02]     |
| Race/Ethnicity (Other)           | 2.27            | .023     | 1057.35   | [143.88, 1970.82]      |
| Family Income (High)             | 3.97            | < .001   | 1122.57   | [567.70, 1677.44]      |
| Family Income (Low)              | -4.49           | < .001   | -1379.70  | [-1981.67, -777.73]    |
| Age                              | 0.32            | .749     | 6.15      | [-31.57, 43.86]        |
| Lead Risk                        | -0.39           | .699     | -24.03    | [-145.81, 97.75]       |
| Maximum Parental Education       | 6.71            | < .001   | 1198.43   | [848.42, 1548.44]      |
| Family Income (High) × Lead Risk | 0.12            | .902     | 9.46      | [-140.56, 159.49]      |
| Family Income (Low) × Lead Risk  | -2.51           | .012     | -205.12   | [-365.03, -45.21]      |

**Note:** The linear mixed-effects model incorporates testing the statistical significance of coefficients against a *t*-distribution. Family Income was a categorical, effects-coded factor, in which the level “Mid” served as the reference level. Family Income was operationally defined as the self-reported combined family income and partitioned into three levels: Low Income: ≤ \$50K; Mid Income: \$50K-\$100K; High Income: ≥ \$100K. Sex was also a categorical factor, effect coded with Male/Female as -1/+1. Race/Ethnicity was also a categorical factor, in which “White” served as the reference level. Age, Maximum Parental Education (i.e., highest education level between parents/caregivers), and Lead Risk were centered continuous factors. The random effects structure included a random intercept for study site and family identification number. Random effects were restricted to be uncorrelated. Analysis included 9,712 data points. The model accounted for 79.1% of the variance in the cortical surface area data ( $R^2 = .791$ , adjusted  $R^2 = .791$ ).

**Supplementary Table 6. Linear mixed-effects model output for the analysis of lead risk, family income, and whole-brain total cortical volume.**

|                                  | <i>t</i> (9699) | <i>p</i> | <i>b</i>  | 95% CI                 |
|----------------------------------|-----------------|----------|-----------|------------------------|
| Intercept                        | 302.28          | < .001   | 576599.07 | [572860.02, 580338.11] |
| Sex                              | -49.60          | < .001   | -23727.95 | [-24665.62, -22790.29] |
| Race/Ethnicity (Asian)           | -1.64           | .102     | -4802.45  | [-10552.96, 948.06]    |
| Race/Ethnicity (Black)           | -15.25          | < .001   | -23290.06 | [-26284.10, -20296.03] |
| Race/Ethnicity (Hispanic)        | 0.99            | .321     | 1354.97   | [-1322.99, 4032.92]    |
| Race/Ethnicity (Other)           | 3.41            | .001     | 5118.25   | [2180.22, 8056.28]     |
| Family Income (High)             | 4.98            | < .001   | 4522.01   | [2740.77, 6303.26]     |
| Family Income (Low)              | -5.43           | < .001   | -5352.81  | [-7286.30, -3419.32]   |
| Age                              | -5.54           | < .001   | -344.06   | [-465.76, -222.35]     |
| Lead Risk                        | -0.01           | .991     | -2.16     | [-388.92, 384.59]      |
| Maximum Parental Education       | 7.41            | < .001   | 4255.53   | [3129.91, 5381.15]     |
| Family Income (High) × Lead Risk | 1.05            | .292     | 258.92    | [-222.81, 740.66]      |
| Family Income (Low) × Lead Risk  | -2.46           | .014     | -643.67   | [-1156.87, -130.47]    |

**Note:** The linear mixed-effects model incorporates testing the statistical significance of coefficients against a *t*-distribution. Family Income was a categorical, effects-coded factor, in which the level “Mid” served as the reference level. Family Income was operationally defined as the self-reported combined family income and partitioned into three levels: Low Income: ≤ \$50K; Mid Income: \$50K-\$100K; High Income: ≥ \$100K. Sex was also a categorical factor, effect coded with Male/Female as -1/+1. Race/Ethnicity was also a categorical factor, in which “White” served as the reference level. Age, Maximum Parental Education (i.e., highest education level between parents/caregivers), and Lead Risk were centered continuous factors. The random effects structure included a random intercept for study site and family identification number. Random effects were restricted to be uncorrelated. Analysis included 9,712 data points. The model accounted for 76.4% of the variance in the cortical volume data ( $R^2 = .764$ , adjusted  $R^2 = .764$ ).

**Supplementary Table 7. Linear mixed-effects model output for the analysis of lead risk, area deprivation index (ADI), and cognitive test scores.**

|                            | <i>t</i> (9699) | <i>p</i> | <i>b</i> | 95% CI         |
|----------------------------|-----------------|----------|----------|----------------|
| Intercept                  | 326.42          | < .001   | 82.85    | [82.36, 83.35] |
| Sex                        | 4.11            | < .001   | 0.31     | [0.16, 0.46]   |
| Race/Ethnicity (Asian)     | 5.49            | < .001   | 2.52     | [1.62, 3.42]   |
| Race/Ethnicity (Black)     | -17.69          | < .001   | -4.24    | [-4.71, -3.77] |
| Race/Ethnicity (Hispanic)  | -2.04           | .042     | -0.43    | [-0.85, -0.02] |
| Race/Ethnicity (Other)     | 2.83            | .005     | 0.66     | [0.20, 1.12]   |
| Age                        | 36.90           | < .001   | 0.37     | [0.35, 0.39]   |
| Lead Risk                  | -0.56           | .575     | -0.02    | [-0.10, 0.05]  |
| Maximum Parental Education | 25.89           | < .001   | 2.05     | [1.89, 2.20]   |
| ADI (High)                 | -5.82           | < .001   | -1.20    | [-1.60, -0.80] |
| ADI (Low)                  | 7.13            | < .001   | 1.08     | [0.78, 1.38]   |
| ADI (High) × Lead Risk     | 0.14            | .892     | 0.01     | [-0.11, 0.13]  |
| ADI (Low) × Lead Risk      | 1.80            | .072     | 0.08     | [-0.01, 0.16]  |

**Note:** The linear mixed-effects model incorporates testing the statistical significance of coefficients against a *t*-distribution. Area Deprivation Index (ADI) was a categorical, effects-coded factor, in which the level “Mid” served as the reference level. ADI was computed in accordance with the coefficient values described in Kind et al. <sup>36</sup>, re-coded in terms of national percentile (i.e., higher values reflect greater levels of disadvantage), and then discretized into Low- (ADI: 0-32), Mid- (33-66), and High-ADI categories (67-100). Sex was also a categorical factor, effect coded with Male/Female as -1/+1. Race/Ethnicity was also a categorical factor, in which “White” served as the reference level. Age, Maximum Parental Education (i.e., highest education level between parents/caregivers), and Lead Risk were centered continuous factors. The random effects structure included a random intercept for study site and family identification number. Random effects were restricted to be uncorrelated. Analysis included 9,712 data points. The model accounted for 64.8% of the variance in the cognitive test score data ( $R^2 = .648$ , adjusted  $R^2 = .648$ ).

**Supplementary Table 8. Linear mixed-effects model output for the analysis of lead risk, area deprivation index (ADI), and whole-brain mean cortical thickness.**

|                            | <i>t</i> (9699) | <i>p</i> | <i>b</i> | 95% CI           |
|----------------------------|-----------------|----------|----------|------------------|
| Intercept                  | 237.87          | < .001   | 2.75     | [2.73, 2.77]     |
| Sex                        | 5.73            | < .001   | 0.01     | [0.004, 0.01]    |
| Race/Ethnicity (Asian)     | -2.67           | .008     | -0.02    | [-0.03, -0.004]  |
| Race/Ethnicity (Black)     | -6.50           | < .001   | -0.02    | [-0.03, -0.01]   |
| Race/Ethnicity (Hispanic)  | 0.07            | .944     | 0.0002   | [-0.01, 0.01]    |
| Race/Ethnicity (Other)     | 2.58            | .010     | 0.01     | [0.002, 0.01]    |
| Age                        | -9.84           | < .001   | -0.001   | [-0.002, -0.001] |
| Lead Risk                  | 0.95            | .344     | 0.0005   | [-0.001, 0.001]  |
| Maximum Parental Education | 3.45            | .001     | 0.004    | [0.002, 0.01]    |
| ADI (High)                 | -1.34           | .180     | -0.004   | [-0.01, 0.002]   |
| ADI (Low)                  | 1.16            | .247     | 0.002    | [-0.002, 0.01]   |
| ADI (High) × Lead Risk     | 0.89            | .376     | 0.001    | [-0.001, 0.002]  |
| ADI (Low) × Lead Risk      | -0.53           | .596     | -0.0003  | [-0.001, 0.001]  |

**Note:** The linear mixed-effects model incorporates testing the statistical significance of coefficients against a *t*-distribution. Area Deprivation Index (ADI) was a categorical, effects-coded factor, in which the level “Mid” served as the reference level. ADI was computed in accordance with the coefficient values described in Kind et al. <sup>36</sup>, re-coded in terms of national percentile (i.e., higher values reflect greater levels of disadvantage), and then discretized into Low- (ADI: 0-32), Mid- (33-66), and High-ADI categories (67-100). Sex was also a categorical factor, effect coded with Male/Female as -1/+1. Race/Ethnicity was also a categorical factor, in which “White” served as the reference level. Age, Maximum Parental Education (i.e., highest education level between parents/caregivers), and Lead Risk were centered continuous factors. The random effects structure included a random intercept for study site and family identification number. Random effects were restricted to be uncorrelated. Analysis included 9,712 data points. The model accounted for 59.5% of the variance in the cortical thickness data ( $R^2 = .595$ , adjusted  $R^2 = .595$ ).



**Supplementary Table 9. Linear mixed-effects model output for the analysis of lead risk, area deprivation index (ADI), and whole-brain total cortical surface area.**

|                            | <i>t</i> (9699) | <i>p</i> | <i>b</i>  | 95% CI                 |
|----------------------------|-----------------|----------|-----------|------------------------|
| Intercept                  | 155.20          | < .001   | 181086.73 | [178799.56, 183373.91] |
| Sex                        | -55.58          | < .001   | -8249.36  | [-8540.30, -7958.42]   |
| Race/Ethnicity (Asian)     | 0.04            | .967     | 38.34     | [-1755.13, 1831.82]    |
| Race/Ethnicity (Black)     | -13.24          | < .001   | -6364.22  | [-7306.73, -5421.71]   |
| Race/Ethnicity (Hispanic)  | 0.65            | .517     | 278.60    | [-563.54, 1120.74]     |
| Race/Ethnicity (Other)     | 2.37            | .018     | 1102.59   | [189.16, 2016.01]      |
| Age                        | 0.48            | .634     | 9.15      | [-28.56, 46.87]        |
| Lead Risk                  | -0.12           | .907     | -9.25     | [-164.12, 145.63]      |
| Maximum Parental Education | 9.65            | < .001   | 1530.30   | [1219.42, 1841.19]     |
| ADI (High)                 | -2.53           | .012     | -1066.67  | [-1894.19, -239.15]    |
| ADI (Low)                  | 3.34            | .001     | 1053.14   | [434.58, 1671.70]      |
| ADI (High) × Lead Risk     | -1.20           | .231     | -149.30   | [-393.50, 94.90]       |
| ADI (Low) × Lead Risk      | 0.15            | .883     | 12.82     | [-157.71, 183.36]      |

**Note:** The linear mixed-effects model incorporates testing the statistical significance of coefficients against a *t*-distribution. Area Deprivation Index (ADI) was a categorical, effects-coded factor, in which the level “Mid” served as the reference level. ADI was computed in accordance with the coefficient values described in Kind et al. <sup>36</sup>, re-coded in terms of national percentile (i.e., higher values reflect greater levels of disadvantage), and then discretized into Low- (ADI: 0-32), Mid- (33-66), and High-ADI categories (67-100). Sex was also a categorical factor, effect coded with Male/Female as -1/+1. Race/Ethnicity was also a categorical factor, in which “White” served as the reference level. Age, Maximum Parental Education (i.e., highest education level between parents/caregivers), and Lead Risk were centered continuous factors. The random effects structure included a random intercept for study site and family identification number. Random effects were restricted to be uncorrelated. Analysis included 9,712 data points. The model accounted for 79.1% of the variance in the cortical surface area data ( $R^2 = .791$ , adjusted  $R^2 = .791$ ).

**Supplementary Table 10. Linear mixed-effects model output for the analysis of lead risk, area deprivation index (ADI), and whole-brain total cortical volume.**

|                            | <i>t</i> (9699) | <i>p</i> | <i>b</i>  | 95% CI                 |
|----------------------------|-----------------|----------|-----------|------------------------|
| Intercept                  | 298.07          | < .001   | 572919.63 | [569151.96, 576687.30] |
| Sex                        | -49.45          | < .001   | -23681.37 | [-24620.07, -22742.67] |
| Race/Ethnicity (Asian)     | -1.63           | .104     | -4781.29  | [-10543.10, 980.52]    |
| Race/Ethnicity (Black)     | -15.37          | < .001   | -23700.13 | [-26723.17, -20677.09] |
| Race/Ethnicity (Hispanic)  | 0.60            | .549     | 821.47    | [-1866.73, 3509.66]    |
| Race/Ethnicity (Other)     | 3.58            | < .001   | 5361.87   | [2422.47, 8301.28]     |
| Age                        | -5.39           | < .001   | -334.44   | [-456.17, -212.71]     |
| Lead Risk                  | 0.62            | .534     | 155.67    | [-334.93, 646.27]      |
| Maximum Parental Education | 10.95           | < .001   | 5577.17   | [4578.46, 6575.88]     |
| ADI (High)                 | -3.16           | .002     | -4237.52  | [-6864.49, -1610.55]   |
| ADI (Low)                  | 3.77            | < .001   | 3754.26   | [1804.58, 5703.95]     |
| ADI (High) × Lead Risk     | -0.41           | .683     | -162.36   | [-941.45, 616.73]      |
| ADI (Low) × Lead Risk      | -0.24           | .808     | -67.47    | [-611.99, 477.06]      |

**Note:** The linear mixed-effects model incorporates testing the statistical significance of coefficients against a *t*-distribution. Area Deprivation Index (ADI) was a categorical, effects-coded factor, in which the level “Mid” served as the reference level. ADI was computed in accordance with the coefficient values described in Kind et al. <sup>36</sup>, re-coded in terms of national percentile (i.e., higher values reflect greater levels of disadvantage), and then discretized into Low- (ADI: 0-32), Mid- (33-66), and High-ADI categories (67-100). Sex was also a categorical factor, effect coded with Male/Female as -1/+1. Race/Ethnicity was also a categorical factor, in which “White” served as the reference level. Age, Maximum Parental Education (i.e., highest education level between parents/caregivers), and Lead Risk were centered continuous factors. The random effects structure included a random intercept for study site and family identification number. Random effects were restricted to be uncorrelated. Analysis included 9,712 data points. The model accounted for 76.5% of the variance in the cortical volume data ( $R^2 = .765$ , adjusted  $R^2 = .765$ ).

## References

- 36 Kind, A. J. H. *et al.* Neighborhood socioeconomic disadvantage and 30-day rehospitalization: A retrospective cohort study. *Annals of Internal Medicine* **161**, 765-774, doi:10.7326/M13-2946 (2014).
- 67 Epton, A., Bordens, A. & Hing, G. *Chicago lead poisoning rates vary by location, time*, <<http://apps.chicagotribune.com/news/watchdog/chicago-lead-poisoning/index.html>> (2015).
- 68 Pell, M. B. & Schneyer, J. in *Unsafe at Any Level: Exposing the Hidden Hazards of Lead Poisoning Across America* (ed Reuters) (2016).
- 69 Maryland Department of Health. Dataset: Maryland Environmental Public Health Tracking. **2019**, Available at: <https://phpa.health.maryland.gov/OEHFP/EH/tracking/Pages/Home.aspx>.
- 70 Massachusetts Environmental Public Health Tracking. Dataset: Childhood Lead Poisoning. Available at: [https://matracking.ehs.state.ma.us/Health-Data/Childhood\\_Blood\\_Lead\\_Levels.html](https://matracking.ehs.state.ma.us/Health-Data/Childhood_Blood_Lead_Levels.html).
- 71 Data Driven Detroit. Dataset: LeadBloodLevels 2017 byTract 20181129. **2019**, Available at: [https://d3-d3.opendata.arcgis.com/datasets/37725e37291c37724d34481b37727e37722dd37720e37967de37775b\\_37720](https://d3-d3.opendata.arcgis.com/datasets/37725e37291c37724d34481b37727e37722dd37720e37967de37775b_37720) (2019).
- 72 Minnesota Public Health Access Data Portal. Dataset: Childhood Lead Exposure Map by Census Tract. **2018**, Available at: <https://mndatamaps.web.health.state.mn.us/interactive/leadtract.html> (2018).
- 73 Wisconsin Department of Health Services. Dataset: Wisconsin EPH Tracker. **2018**, Available at: <https://dhsgis.wi.gov/DHS/EPHTracker/>.
